# Supplementary material for: Using a flexible bis(pyrazol) ligand to construct four new Keggin-based compounds: syntheses, structures and properties
Source: Royal Society of Chemistry journal article supplement (doi:10.1039/c6ra25156k), 2017-01-01
Supplement: c6ra25156k1.pdf [file c6ra25156k1.pdf]

## Supporting Information

### Using a flexible bis(pyrazol) ligand to construct four new Keggin-based compounds: syntheses, structures and properties

Aixiang Tian\*, Huaiping Ni, Xuebin Ji, Yan Tian, Guocheng Liu, Jun Ying\*

*Department of Chemistry, Bohai University, Jinzhou 121013, P. R. China*

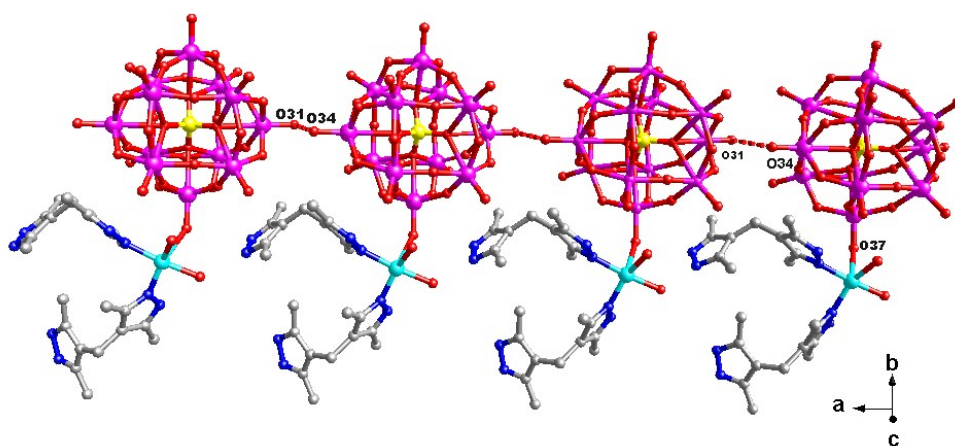

**Fig. S1.** The 1D supramolecular chain of compound **1** through hydrogen bonding interactions ( $O31 \cdots O34 = 3.238 \text{ \AA}$ ).

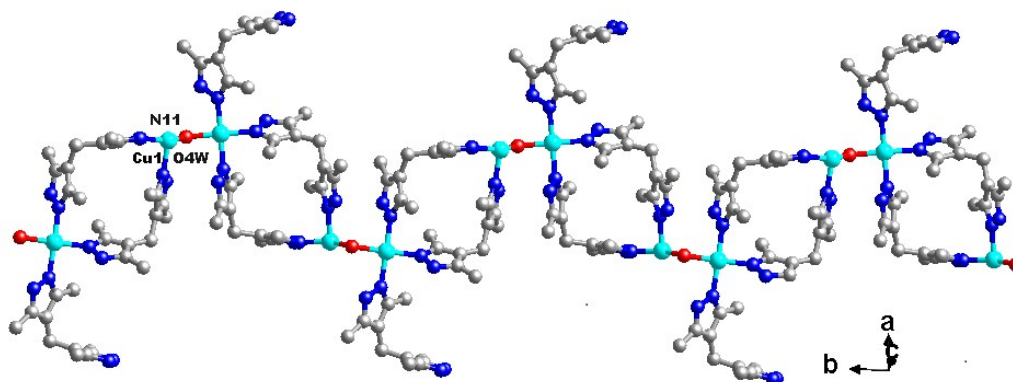

**Fig. S2.** The 1D cycle-connecting-cycle chain of **3** with type-I  $H_2bdpm$  hanging up and down.

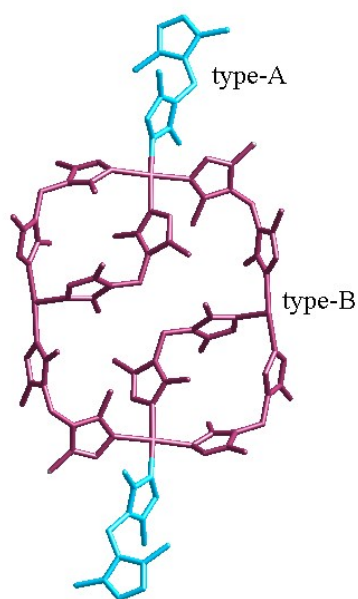

**Fig. S3.** Two functions of the H<sub>2</sub>bdpm: linking mode (blue, type-A) and cyclization mode (purple, type-B).

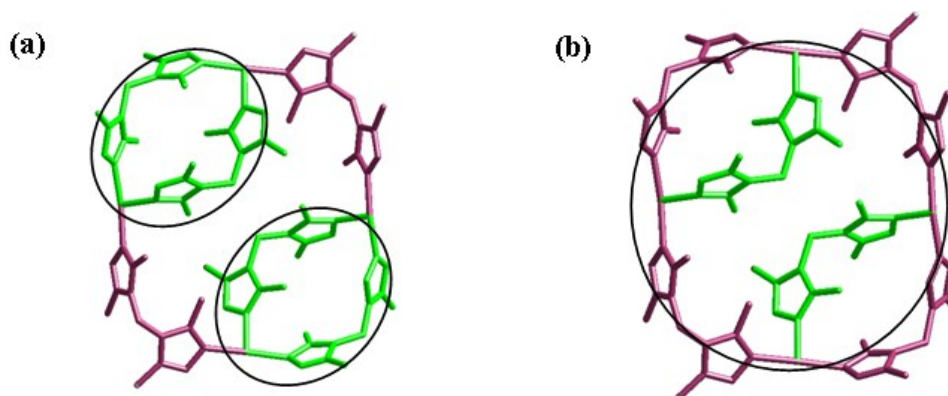

**Fig. S4.** (a) The bi-nuclear  $[\text{Cu}_2(\text{H}_2\text{bdpm})_2]^{4+}$  cycle (green) in nested cycle subunit. (b) The tetra-nuclear cycle (purple) in nested cycle subunit.

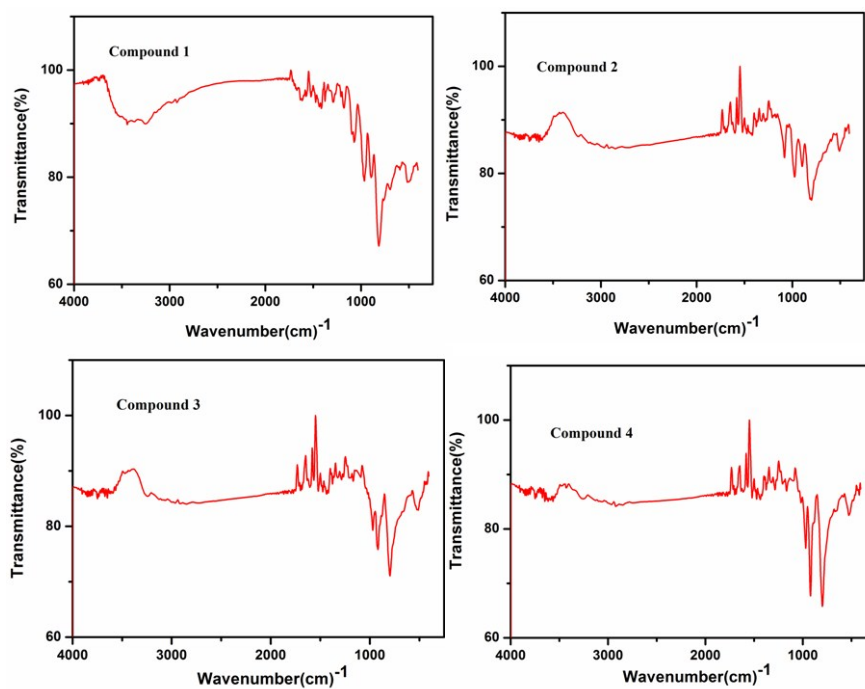

**Fig. S5.** The IR spectra of compounds **1**, **2**, **3** and **4**.

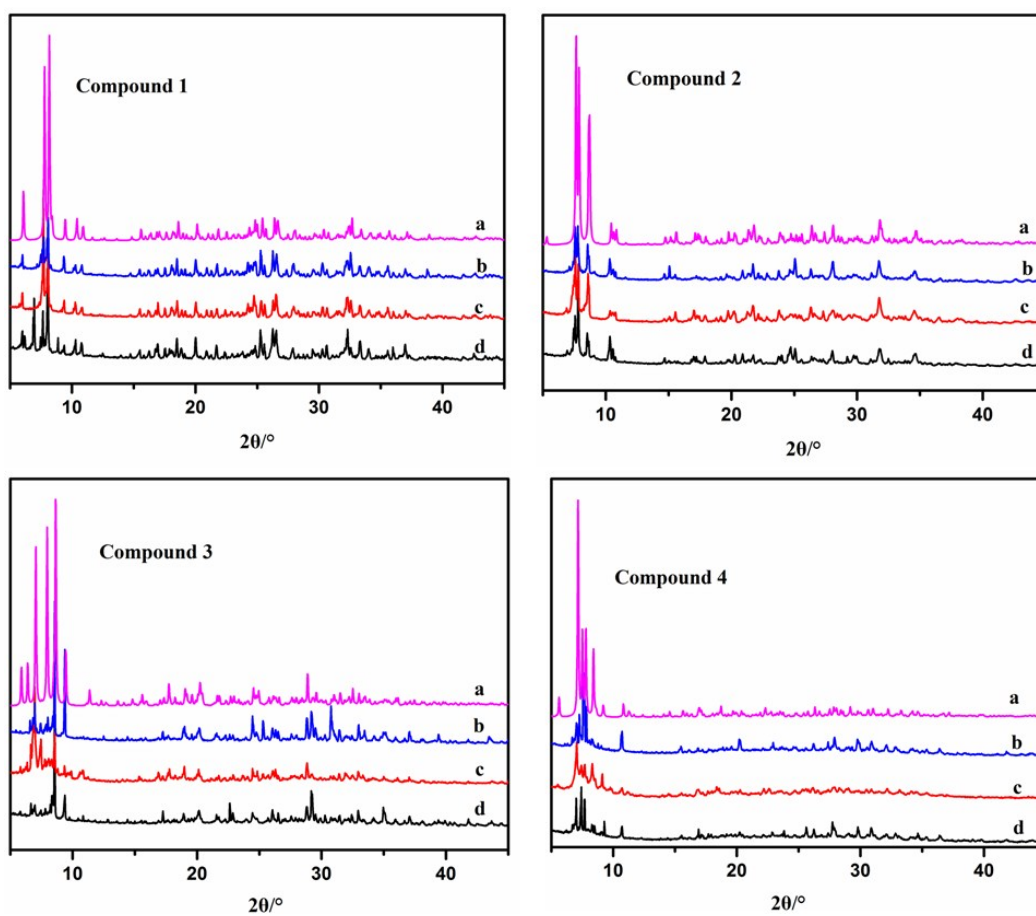

**Fig. S6.** The simulative (a), experimental (b) and recycled after photocatalysis (c for MB and d for RhB) powder X-ray diffraction patterns for compounds **1–4**.

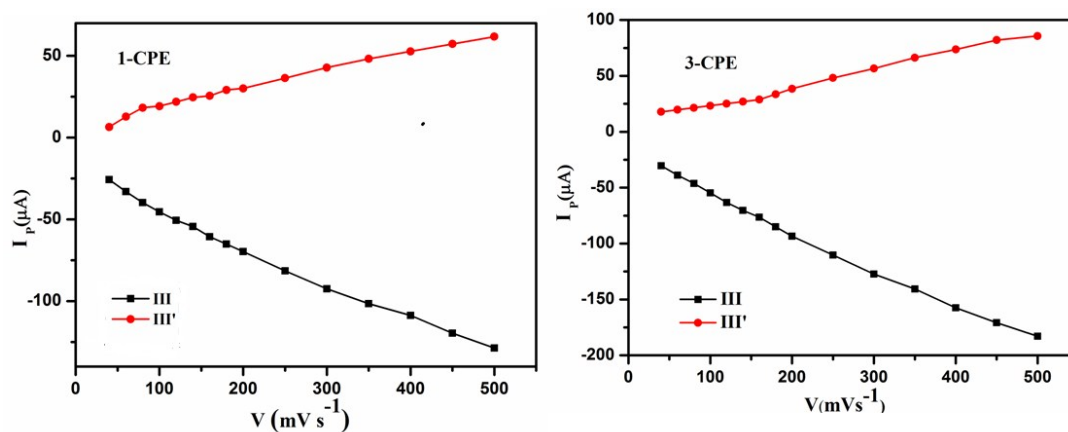

**Fig. S7.** The dependence of anodic peak (III) and cathodic peak (III') currents of 1- and 3-CPE on scan rates.

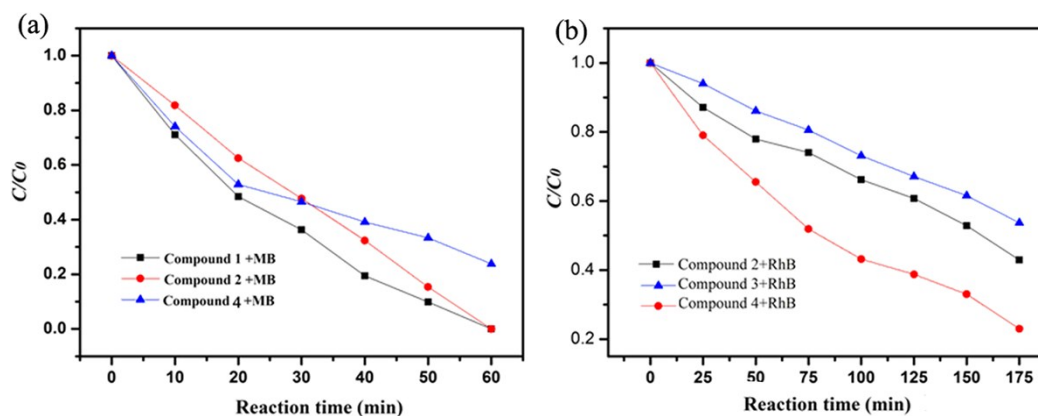

**Fig. S8.** Photocatalytic decomposition rates of MB (a) and RhB (b) solutions under UV irradiation with the use of compounds 1, 2, 3 and 4.

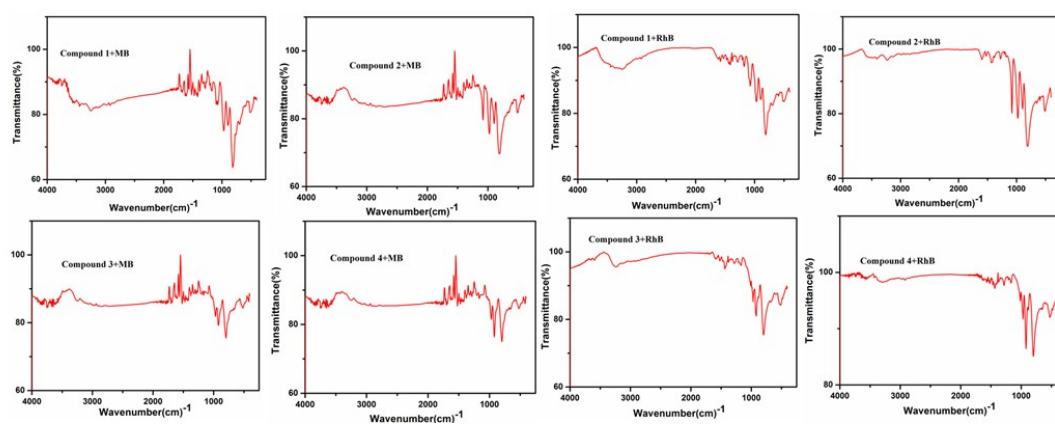

**Fig. S9.** The IR spectra for recycled catalysts 1-4 after photocatalysis.

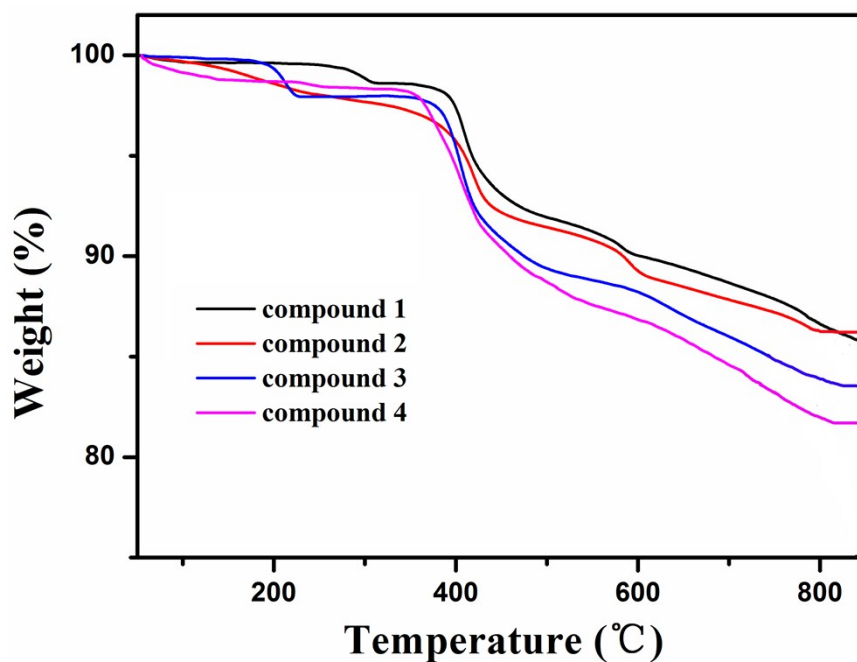

**Fig. S10.** The TG curves for compounds 1–4.

**Table S1.** Selected bond distances (Å) and angles (°) for compounds 1–4.

| Compound 1        |           |                   |           |
|-------------------|-----------|-------------------|-----------|
| Cu(1)-N(2)        | 1.924(11) | Cu(1)-O(1W)       | 1.942(9)  |
| Cu(1)-N(5)        | 1.955(12) | Cu(1)-O(2W)       | 1.962(10) |
| Cu(1)-O(37)       | 2.553(10) | N(6)-N(5)-Cu(1)   | 123.8(9)  |
| N(2)-Cu(1)-O(1W)  | 90.7(4)   | N(2)-Cu(1)-N(5)   | 92.8(5)   |
| O(1W)-Cu(1)-N(5)  | 174.5(5)  | N(2)-Cu(1)-O(2W)  | 150.6(5)  |
| O(1W)-Cu(1)-O(2W) | 86.8(4)   | N(5)-Cu(1)-O(2W)  | 92.2(5)   |
| C(3)-N(2)-Cu(1)   | 130.5(9)  | N(1)-N(2)-Cu(1)   | 125.3(9)  |
| C(12)-N(5)-Cu(1)  | 130.2(10) |                   |           |
| Compound 2        |           |                   |           |
| Cu(1)-O(10)       | 2.93(2)   | Cu(1)-O(22)       | 3.01(2)   |
| Cu(1)-O(42)       | 3.30(2)   | Cu(1)-N(1)        | 1.86(2)   |
| Cu(1)-N(5)        | 1.87(2)   | O(10)-Cu(1)-O(22) | 54.5(6)   |
| O(10)-Cu(1)-O(42) | 98.1(6)   | O(22)-Cu(1)-O(42) | 146.1(6)  |
| N(1)-Cu(1)-O(10)  | 80.1(9)   | N(1)-Cu(1)-O(22)  | 106.8(8)  |

|                  |           |                    |           |
|------------------|-----------|--------------------|-----------|
| N(1)-Cu(1)-O(42) | 84.5(8)   | N(1)-Cu(1)-N(5)    | 170.5(11) |
| N(5)-Cu(1)-O(10) | 108.1(10) | N(5)-Cu(1)-O(22)   | 75.4(9)   |
| N(5)-Cu(1)-O(42) | 98.9(9)   | W(1)#1-O(10)-Cu(1) | 115.1(10) |
| W(2)-O(10)-Cu(1) | 100.7(9)  | W(2)-O(22)-Cu(1)   | 103.5(9)  |
| W(8)-O(42)-Cu(1) | 137.6(12) | N(2)-N(1)-Cu(1)    | 124.0(16) |
| C(3)-N(1)-Cu(1)  | 129.9(19) | N(6)-N(5)-Cu(1)    | 123.1(18) |
| C(14)-N(5)-Cu(1) | 126(2)    |                    |           |

Symmetry codes: #1 -x+1,-y+2,-z #2 -x,-y+3,-z-1

### Compound 3

|                    |           |                    |           |
|--------------------|-----------|--------------------|-----------|
| Cu(1)-O(4W)        | 1.911(8)  | Cu(1)-N(12)        | 1.960(10) |
| Cu(1)-N(2)#1       | 1.995(11) | Cu(1)-O(3W)        | 2.017(10) |
| Cu(1)-O(37)        | 2.451(10) | N(9)-Cu(2)#1       | 2.000(11) |
| Cu(2)-O(4W)        | 1.951(8)  | Cu(2)-N(3)         | 1.965(10) |
| Cu(2)-N(9)#2       | 2.000(11) | Cu(2)-N(7)         | 2.029(10) |
| N(2)-Cu(1)#2       | 1.995(11) | N(11)-N(12)-Cu(1)  | 128.9(9)  |
| O(4W)-Cu(1)-N(12)  | 156.1(4)  | O(4W)-Cu(1)-N(2)#1 | 89.4(4)   |
| N(12)-Cu(1)-N(2)#1 | 94.5(5)   | N(12)-Cu(1)-O(3W)  | 87.4(4)   |
| O(4W)-Cu(1)-O(3W)  | 88.7(4)   | N(2)#1-Cu(1)-O(3W) | 178.0(4)  |
| O(4W)-Cu(2)-N(3)   | 177.7(4)  | O(4W)-Cu(2)-N(9)#2 | 89.1(4)   |
| N(3)-Cu(2)-N(9)#2  | 89.8(4)   | O(4W)-Cu(2)-N(7)   | 90.0(4)   |
| N(3)-Cu(2)-N(7)    | 91.4(4)   | N(9)#2-Cu(2)-N(7)  | 170.9(4)  |
| C(4)-N(2)-Cu(1)#2  | 137.0(10) | N(1)-N(2)-Cu(1)#2  | 117.5(8)  |
| C(8)-N(3)-Cu(2)    | 132.6(8)  | N(4)-N(3)-Cu(2)    | 121.9(7)  |
| Cu(1)-O(4W)-Cu(2)  | 124.8(4)  | C(12)-N(7)-Cu(2)   | 134.9(8)  |
| N(8)-N(7)-Cu(2)    | 118.8(8)  | N(10)-N(9)-Cu(2)#1 | 123.5(8)  |
| C(25)-N(9)-Cu(2)#1 | 131.9(8)  | C(31)-N(12)-Cu(1)  | 121.9(10) |

Symmetry codes: #1 -x-1/2,y+1/2,-z+1/2 #2 -x-1/2,y-1/2,-z+1/2

### Compound 4

|            |           |            |           |
|------------|-----------|------------|-----------|
| Cu(1)-N(4) | 2.022(11) | Cu(1)-N(6) | 2.019(12) |
|------------|-----------|------------|-----------|

|                                                                                           |           |                     |           |
|-------------------------------------------------------------------------------------------|-----------|---------------------|-----------|
| Cu(1)-N(10)                                                                               | 2.036(11) | Cu(1)-N(12)         | 2.073(12) |
| N(1)-Cu(2)#1                                                                              | 2.005(12) | Cu(2)-N(15)         | 1.978(12) |
| Cu(2)-N(1)#2                                                                              | 2.005(12) | Cu(2)-N(14)         | 2.021(12) |
| Cu(2)-N(7)#3                                                                              | 2.029(12) | Cu(2)-O(30)         | 2.332(10) |
| N(7)-Cu(2)#3                                                                              | 2.029(12) | N(6)-Cu(1)-N(4)     | 176.6(5)  |
| N(6)-Cu(1)-N(10)                                                                          | 88.0(5)   | N(4)-Cu(1)-N(10)    | 89.1(5)   |
| N(4)-Cu(1)-N(12)                                                                          | 89.0(5)   | N(6)-Cu(1)-N(12)    | 93.7(5)   |
| N(10)-Cu(1)-N(12)                                                                         | 178.1(5)  | C(3)-N(1)-Cu(2)#1   | 134.5(10) |
| N(2)-N(1)-Cu(2)#1                                                                         | 117.7(9)  | N(15)-Cu(2)-N(1)#2  | 152.9(5)  |
| N(15)-Cu(2)-N(14)                                                                         | 87.3(5)   | N(1)#2-Cu(2)-N(14)  | 88.8(5)   |
| N(15)-Cu(2)-N(7)#3                                                                        | 93.5(5)   | C(9)-N(4)-Cu(1)     | 130.7(10) |
| N(14)-Cu(2)-N(7)#3                                                                        | 169.1(5)  | N(1)#2-Cu(2)-N(7)#3 | 95.3(5)   |
| N(1)#2-Cu(2)-O(30)                                                                        | 92.8(4)   | N(15)-Cu(2)-O(30)   | 113.2(5)  |
| N(7)#3-Cu(2)-O(30)                                                                        | 86.7(4)   | N(14)-Cu(2)-O(30)   | 83.0(4)   |
| N(3)-N(4)-Cu(1)                                                                           | 113.7(9)  | C(19)-N(6)-Cu(1)    | 134.6(10) |
| N(5)-N(6)-Cu(1)                                                                           | 118.2(9)  | C(23)-N(7)-Cu(2)#3  | 134.8(10) |
| N(8)-N(7)-Cu(2)#3                                                                         | 120.3(9)  | C(29)-N(10)-Cu(1)   | 130.9(10) |
| N(9)-N(10)-Cu(1)                                                                          | 121.7(9)  | C(42)-N(12)-Cu(1)   | 137.4(12) |
| N(11)-N(12)-Cu(1)                                                                         | 109.0(9)  | C(34)-N(14)-Cu(2)   | 134.7(10) |
| N(13)-N(14)-Cu(2)                                                                         | 116.4(9)  | C(15)-N(15)-Cu(2)   | 128.0(11) |
| N(16)-N(15)-Cu(2)                                                                         | 124.0(9)  | W(9)-O(30)-Cu(2)    | 137.2(5)  |
| Symmetry codes: #1 -x+3/2,y-1/2,-z+1/2    #2 -x+3/2,y+1/2,-z+1/2    #3 -x+3/2,-y+1/2,-z+1 |           |                     |           |
